# Supplementary material
Source: PubMed Central journal article supplement (PMC6142277)
Supplement: pnas.1711978115.sapp.pdf [file pnas.1711978115.sapp.pdf]

Supporting Information Table 1: Number (and percentage) of intra-individual models effectively whitened by regression on lagged and cross-lagged variables.

|                                        | <b>Lag &amp; Cross-lag 1</b> | <b>Lag &amp; Cross-lag 2</b> | <b>Lag 3 or greater</b> | <b>N</b> |
|----------------------------------------|------------------------------|------------------------------|-------------------------|----------|
| <b>Depression (w/ worry )</b>          | 75 (96%)                     | 3 (4%)                       | 0                       | 78       |
| <b>Depression (w/ anhedonia )</b>      | 76 (97%)                     | 2 (3%)                       | 0                       | 78       |
| <b>Fear (w/ avoidance )</b>            | 75 (96%)                     | 3 (4%)                       | 0                       | 78       |
| <b>Worry (w/ depression )</b>          | 75 (96%)                     | 3 (4%)                       | 0                       | 78       |
| <b>Anhedonia (w/ depression )</b>      | 77 (99%)                     | 1 (1%)                       | 0                       | 78       |
| <b>Avoidance (w/ fear )</b>            | 76 (97%)                     | 2 (3%)                       | 0                       | 78       |
| <b>Heart Rate (w/ RSA )</b>            | 3 (4%)                       | 39 (57%)                     | 27 (39%)                | 69       |
| <b>RSA (w/ heart rate )</b>            | 8 (12%)                      | 50 (72%)                     | 11 (16%)                | 69       |
| <b>Sample 3: NA (w/ PA )</b>           | 83 (100%)                    | 0                            | 0                       | 83       |
| <b>Sample 3: PA (w/ NA )</b>           | 82 (99%)                     | 1 (1%)                       | 0                       | 83       |
| <b>Sample 4: NA (w/ PA )</b>           | 58 (92%)                     | 5 (8%)                       | 0                       | 63       |
| <b>Sample 4: PA (w/ NA )</b>           | 54 (86%)                     | 8 (13%)                      | 1 (1%)                  | 63       |
| <b>Sample 5: NA (w/ PA )</b>           | 63 (100%)                    | 0                            | 0                       | 63       |
| <b>Sample 5: PA (w/ NA )</b>           | 62 (99%)                     | 1 (1%)                       | 0                       | 63       |
| <b>Sample 6: NA Low (w/ PA Low )</b>   | 528 (99%)                    | 7 (1%)                       | 0                       | 535      |
| <b>Sample 6: PA Low (w/ NA Low )</b>   | 529 (99%)                    | 6 (1%)                       | 0                       | 535      |
| <b>Sample 6: NA High (w/ PA High )</b> | 527 (99%)                    | 8 (1%)                       | 0                       | 535      |
| <b>Sample 6: PA High (w/ NA High )</b> | 530 (99%)                    | 5 (1%)                       | 0                       | 535      |

Note: Lag number indicates highest-order lag and cross-lag included in model; w/ indicates variables included as cross-lagged predictors in residual model; NA = negative affect; PA = positive affect; High = high-arousal; Low = low-arousal.
